# Supplementary material for: PhasomeIt: an ‘omics’ approach to cataloguing the potential breadth of phase variation in the genus Campylobacter
Source: PubMed Central journal article supplement (PMC6321876; doi:10.1099/mgen.0.000228), 2018-10-23
Supplement: mgen-4-228-s001.pdf [file mgen-4-228-s001.pdf]

**Supplementary Table 1. Speed comparison for Bossref**

| Program <sup>1</sup> | Time (s) <sup>2</sup> |
|----------------------|-----------------------|
| Bossref              | 5.9                   |
| TROLL                | 19.9                  |

<sup>1</sup>Bossref, this manuscript; TROLL ([Castelo \*et al.\*, 2002](#)). <sup>2</sup>Timings based on search for all perfect SSRs of 20bp or greater and repeat unit size of 1-5bp in the *Arabidopsis thaliana* genome sequence. Performed on BioLinux 8.0.7 running in Oracle VirtualBox 5.1.2 with 4 Gb of RAM on an Intel i5-6600K processor running at 4.2 Ghz. Timings are the average of 5 runs of each program.

**Supplementary Table 2. Accession numbers for one or more genome sequences of 15 *Campylobacter* species.**

| <b>Species</b>            | <b>n</b> | <b>Strains (accession numbers)</b>                                                                                                                                                                 |
|---------------------------|----------|----------------------------------------------------------------------------------------------------------------------------------------------------------------------------------------------------|
| <i>C. coli</i>            | 10       | RM1875 (CP007183), RM4661 (CP007181), RM5611 (CP007179), FB1 (CP011015), BFR-CA-9557 (CP011777), HC2-48 (CP013034), OR12 (CP013733), CVM N29710 (CP004066), YH501 (CP015528), 15-537360 (CP006702) |
| <i>C. concisus</i>        | 2        | 13826 (CP000792), ATCC 33237 (CP012541)                                                                                                                                                            |
| <i>C. curvus</i>          | 1        | 525.92 (CP000767)                                                                                                                                                                                  |
| <i>C. fetus</i>           | 8        | 04/554 (CP008808), 97/608 (CP008810), pet-3 (CP009226), 84-112 (HG004426), 82-40 (CP000487), SP3 (CP010953), 03-427 (CP006833), cfvi03/293 (CP006999)                                              |
| <i>C. gracilis</i>        | 1        | ATCC 33236 (CP012196)                                                                                                                                                                              |
| <i>C. hominis</i>         | 1        | ATCC BAA-381 (CP000776)                                                                                                                                                                            |
| <i>C. hyointestinalis</i> | 2        | LMG 9260 (CP015575), CCUG 27631 (CP015576)                                                                                                                                                         |
| <i>C. iguaniorum</i>      | 3        | 1485E (CP009043), 2463D (CP010995), RM11343 (CP015577)                                                                                                                                             |
| <i>C. insulaenigrae</i>   | 1        | NCTC 12927 (CP007770)                                                                                                                                                                              |

---

|                          |    |                                                                     |
|--------------------------|----|---------------------------------------------------------------------|
|                          |    | R14 (CP005081), CG8421 (CP005388), MTVDSCj20 (CP008787), 00-2538    |
|                          |    | (CP006707), 00-2425 (CP006729), 00-2544 (CP006709), 00-2426         |
|                          |    | (CP006708), F38011 (CP006851), YH001 (CP010058), 00-1597            |
|                          |    | (CP010306),                                                         |
|                          |    | 00-6200 (CP010307), 01-1512 (CP010072), 00-0949 (CP010301),         |
|                          |    | ICDCCJ07001 (CP002029), 35925B2 (CP010906), NCTC 11168              |
| <i>C. jejuni</i>         | 35 | (AL111168), RM1221 (CP000025), 81-176 (CP000538), M1 (CP001900), S3 |
|                          |    | (CP001960), Isolate: IA3902 (CP001876), 269.97 (CP000768), 81116;   |
|                          |    | NCTC 11828 (CP000814), 32488 (CP006006), RM3197 (CP012689),         |
|                          |    | RM3196 (CP012690), CJM1cam (CP012149), NCTC11351 (LN831025),        |
|                          |    | CJ677CC519 (CP010471), RM3194 (CP014344), OD267 (CP014744),         |
|                          |    | WP2202 (CP014742), PT14 (CP003871), RM1285 (CP015209), 4031         |
|                          |    | (HG428754)                                                          |
|                          |    | LMG 11760 (CP007771), NCTC 11845 (CP007775), RM16701                |
| <i>C. lari</i>           | 7  | (CP007777),                                                         |
|                          |    | RM16712 (CP007778), Slaughter Beach (CP011372), RM2100; ATCC        |
|                          |    | BAA-1060D (CP000932), CCUG 22395 (CP007776)                         |
| <i>C. peloridis</i>      | 1  | LMG 23910 (CP007766)                                                |
| <i>C. sp.</i>            | 1  | RM16704 (CP007769)                                                  |
| <i>C. subantarcticus</i> | 2  | LMG 24374 (CP007772), LMG 24377 (CP007773)                          |
| <i>C. ureolyticus</i>    | 1  | RIGS 9880 (CP012195)                                                |

---

**Supplementary Table 3. The twenty most frequent phase-variable functional groups.**

| Group name           | In frame <sup>1</sup> | Total <sup>2</sup> | Total <sup>2</sup> | Putative function                                                            |
|----------------------|-----------------------|--------------------|--------------------|------------------------------------------------------------------------------|
|                      |                       | PV                 |                    |                                                                              |
| <i>maf7</i>          | 200                   | 203                | 233                | carbonic anhydrase                                                           |
| <i>cj1295</i>        | 64                    | 65                 | 72                 | hypothetical protein (DUF2172 domain),<br>putative M28 family zinc peptidase |
| <i>maf1</i>          | 63                    | 65                 | 123                | motility accessory factor                                                    |
| <i>cj0170</i>        | 47                    | 52                 | 54                 | SAM-dependent methyltransferase                                              |
| <i>cj1421c</i>       | 45                    | 52                 | 55                 | putative sugar transferase                                                   |
| <i>ubiE_3</i>        | 48                    | 48                 | 48                 | SAM-dependent methyltransferase                                              |
| <i>cj0045c</i>       | 43                    | 43                 | 45                 | Hemerythrin-like iron-binding protein                                        |
| <i>cipA</i>          | 36                    | 36                 | 39                 | Invasion protein CipA                                                        |
| <i>A911_07000</i>    | 34                    | 34                 | 50                 | sugar transferase                                                            |
| <i>UPTC4110_0710</i> | 30                    | 31                 | 45                 | No annotation data                                                           |
| <i>cj1296</i>        | 29                    | 30                 | 92                 | aminoglycoside N3'-acetyltransferase                                         |
| <i>hxB_1</i>         | 0                     | 25                 | 36                 | Heme/hemopexin transporter protein<br>HuxB precursor                         |
| <i>ansA</i>          | 0                     | 24                 | 78                 | L-asparaginase                                                               |
| <i>cj0628</i>        | 19                    | 23                 | 35                 | putative lipoprotein                                                         |
| <i>cjeI</i>          | 21                    | 21                 | 47                 | restriction endonuclease                                                     |
| <i>lgrA</i>          | 21                    | 21                 | 29                 | formyl transferase domain protein                                            |

---

|                      |    |    |    |                                 |
|----------------------|----|----|----|---------------------------------|
| <i>A911_t08342</i>   | 0  | 21 | 75 | No annotation data              |
| <i>CFT03427_1115</i> | 19 | 20 | 21 | autotransporter domain protein  |
| <i>PJ18_06805</i>    | 18 | 20 | 50 | N-acetyl sugar amidotransferase |
| <i>epsM</i>          | 0  | 19 | 23 | putative transferase            |

---

<sup>1</sup>In frame, the number of genes with an SSR in the CDS; <sup>2</sup>Total PV, total number of genes with either an SSR in the CDS or in an intergenic region.

.

**Supplementary Table 4. Number coding of complete *Campylobacter* genome sequences.**

| <b>Number</b> | <b>Species</b>   | <b>Strain</b>     |
|---------------|------------------|-------------------|
| 1             |                  | NCTC 11168        |
| 2             |                  | 81-176            |
| 3             |                  | PT14              |
| 4             |                  | 00-0949           |
| 5             |                  | 00-1597           |
| 6             |                  | 00-2425           |
| 7             |                  | 00-2426           |
| 8             |                  | 00-2538           |
| 9             | <i>C. jejuni</i> | 00-2544           |
| 10            |                  | 00-6200           |
| 11            |                  | 01-1512           |
| 12            |                  | 269.97            |
| 13            |                  | 4031              |
| 14            |                  | 32488             |
| 15            |                  | 35925B2           |
| 16            |                  | 81116; NCTC 11828 |
| 17            |                  | CG8421            |

---

|    |  |             |
|----|--|-------------|
| 18 |  | CJ677CC519  |
| 19 |  | CJM1cam     |
| 20 |  | F38011      |
| 21 |  | IA3902      |
| 22 |  | ICDCCJ07001 |
| 23 |  | M1          |
| 24 |  | MTVDSCj20   |
| 25 |  | NCTC11351   |
| 26 |  | OD267       |
| 27 |  | R14         |
| 28 |  | RM1221      |
| 29 |  | RM1285      |
| 30 |  | RM3194      |
| 31 |  | RM3196      |
| 32 |  | RM3197      |
| 33 |  | S3          |
| 34 |  | WP2202      |
| 35 |  | YH001       |

---

|    |                |           |
|----|----------------|-----------|
| 36 | <i>C. coli</i> | 15-537360 |
|----|----------------|-----------|

---

---

37 BFR-CA-9557

38 CVM N29710

39 FB1

40 HC2-48

41 OR12

42 RM1875

43 RM4661

44 RM5611

45 YH501

---

46 13826

*C. concisus*

47 ATCC 33237

48 *C. curvus* 525.92

---

49 03-427

50 04/554

51 82-40

52 *C. fetus* 84-112

53 97/608

54 SP3

55 cfvi03/293

---



|    |                           |                        |
|----|---------------------------|------------------------|
| 56 |                           | pet-3                  |
| 57 | <i>C. gracilis</i>        | ATCC 33236             |
| 58 | <i>C. hominis</i>         | ATCC BAA-381           |
| 59 |                           | CCUG 27631             |
| 60 | <i>C. hyointestinalis</i> | LMG 9260               |
| 61 |                           | 1485E                  |
| 62 | <i>C. iguaniorum</i>      | 2463D                  |
| 63 |                           | RM11343                |
| 64 | <i>C. insulaenigrae</i>   | NCTC 12927             |
| 65 |                           | CCUG 22395             |
| 66 |                           | LMG 11760              |
| 67 |                           | NCTC 11845             |
| 68 | <i>C. lari</i>            | RM2100; ATCC BAA-1060D |
| 69 |                           | RM16701                |
| 70 |                           | RM16712                |
| 71 |                           | Slaughter Beach        |
| 72 | <i>C. peloridis</i>       | LMG 23910              |
| 73 | <i>C. sp.</i>             | RM16704                |

---

|    |                          |           |
|----|--------------------------|-----------|
| 74 |                          | LMG 24374 |
|    | <i>C. subantarcticus</i> |           |
| 75 |                          | LMG 24377 |

---

|    |                       |           |
|----|-----------------------|-----------|
| 76 | <i>C. ureolyticus</i> | RIGS 9880 |
|----|-----------------------|-----------|

---

|    |                    |           |
|----|--------------------|-----------|
| 77 | <i>C. volucris</i> | LMG 24379 |
|----|--------------------|-----------|

---

Supplementary Table 5. Numbers of contigs, PV loci and homology groups for the partial genome sequences of *C. jejuni* and *C. coli* isolates with meta-data

| Species                  | Genome Sequence File No. | No. of Contigs | No. of PV Genes | No. of PV Homology Groups |
|--------------------------|--------------------------|----------------|-----------------|---------------------------|
| <i>C. jejuni</i>         | NCTC 11168               | 1              | 31              | 25                        |
| <i>C. coli</i>           | 15-537360                | 1              | 21              | 17                        |
| <i>C. coli - clade 2</i> | 1.gbk                    | 167            | 10              | 9                         |
| <i>C. coli - clade 1</i> | 2.gbk                    | 184            | 17              | 13                        |
| <i>C. coli - clade 3</i> | 3.gbk                    | 125            | 4               | 4                         |
| <i>C. jejuni</i>         | 4.gbk                    | 108            | 7               | 7                         |
| <i>C. coli - clade 1</i> | 5.gbk                    | 255            | 10              | 6                         |
| <i>C. coli - clade 3</i> | 8.gbk                    | 281            | 3               | 3                         |
| <i>C. coli - clade 2</i> | 10.gbk                   | 191            | 13              | 11                        |
| <i>C. coli - clade 2</i> | 11.gbk                   | 312            | 9               | 9                         |
| <i>C. coli - clade 2</i> | 12.gbk                   | 282            | 8               | 8                         |
| <i>C. jejuni</i>         | 13.gbk                   | 86             | 13              | 13                        |
| <i>C. jejuni</i>         | 14.gbk                   | 324            | 12              | 12                        |
| <i>C. coli - clade 1</i> | 15.gbk                   | 216            | 11              | 11                        |
| <i>C. coli - clade 1</i> | 17.gbk                   | 79             | 11              | 8                         |
| <i>C. coli - clade 1</i> | 18.gbk                   | 206            | 16              | 14                        |
| <i>C. coli - clade 1</i> | 19.gbk                   | 276            | 10              | 10                        |
| <i>C. coli - clade 1</i> | 20.gbk                   | 691            | 10              | 9                         |
| <i>C. coli - clade 1</i> | 21.gbk                   | 374            | 6               | 5                         |
| <i>C. jejuni</i>         | 22.gbk                   | 169            | 7               | 7                         |
| <i>C. jejuni</i>         | 23.gbk                   | 446            | 1               | 1                         |
| <i>C. coli - clade 1</i> | 24.gbk                   | 532            | 10              | 7                         |
| <i>C. coli - clade 1</i> | 25.gbk                   | 261            | 16              | 15                        |
| <i>C. jejuni</i>         | 26.gbk                   | 1              | 18              | 17                        |
| <i>C. jejuni</i>         | 27.gbk                   | 1              | 20              | 17                        |
| <i>C. jejuni</i>         | 28.gbk                   | 1              | 27              | 25                        |
| <i>C. jejuni</i>         | 29.gbk                   | 1              | 31              | 25                        |
| <i>C. jejuni</i>         | 30.gbk                   | 465            | 14              | 12                        |

|                  |        |      |    |    |
|------------------|--------|------|----|----|
| <i>C. jejuni</i> | 32.gbk | 92   | 19 | 17 |
| <i>C. jejuni</i> | 34.gbk | 91   | 20 | 15 |
| <i>C. jejuni</i> | 36.gbk | 47   | 27 | 18 |
| <i>C. jejuni</i> | 37.gbk | 113  | 27 | 24 |
| <i>C. jejuni</i> | 39.gbk | 84   | 20 | 15 |
| <i>C. jejuni</i> | 40.gbk | 195  | 21 | 14 |
| <i>C. jejuni</i> | 42.gbk | 41   | 17 | 14 |
| <i>C. jejuni</i> | 43.gbk | 3226 | 31 | 20 |
| <i>C. coli</i>   | 44.gbk | 55   | 19 | 15 |
| <i>C. jejuni</i> | 45.gbk | 72   | 13 | 12 |
| <i>C. jejuni</i> | 48.gbk | 62   | 29 | 25 |
| <i>C. jejuni</i> | 49.gbk | 181  | 31 | 26 |
| <i>C. jejuni</i> | 52.gbk | 102  | 18 | 18 |
| <i>C. jejuni</i> | 54.gbk | 241  | 21 | 15 |
| <i>C. jejuni</i> | 55.gbk | 271  | 14 | 14 |
| <i>C. jejuni</i> | 56.gbk | 62   | 20 | 17 |
| <i>C. jejuni</i> | 57.gbk | 158  | 11 | 10 |
| <i>C. jejuni</i> | 59.gbk | 60   | 28 | 22 |
| <i>C. jejuni</i> | 60.gbk | 58   | 29 | 22 |
| <i>C. jejuni</i> | 62.gbk | 100  | 27 | 24 |
| <i>C. jejuni</i> | 63.gbk | 139  | 29 | 24 |
| <i>C. jejuni</i> | 64.gbk | 113  | 14 | 13 |
| <i>C. jejuni</i> | 65.gbk | 112  | 34 | 29 |
| <i>C. jejuni</i> | 66.gbk | 129  | 31 | 29 |
| <i>C. jejuni</i> | 67.gbk | 143  | 20 | 17 |
| <i>C. jejuni</i> | 68.gbk | 251  | 33 | 31 |
| <i>C. jejuni</i> | 69.gbk | 144  | 21 | 16 |
| <i>C. jejuni</i> | 70.gbk | 343  | 22 | 21 |
| <i>C. jejuni</i> | 71.gbk | 84   | 24 | 18 |
| <i>C. jejuni</i> | 72.gbk | 63   | 24 | 18 |
| <i>C. jejuni</i> | 73.gbk | 102  | 27 | 21 |
| <i>C. jejuni</i> | 74.gbk | 65   | 22 | 19 |

|                          |         |     |    |    |
|--------------------------|---------|-----|----|----|
| <i>C. jejuni</i>         | 75.gbk  | 76  | 26 | 20 |
| <i>C. jejuni</i>         | 77.gbk  | 65  | 24 | 18 |
| <i>C. jejuni</i>         | 78.gbk  | 67  | 23 | 19 |
| <i>C. jejuni</i>         | 79.gbk  | 120 | 15 | 12 |
| <i>C. jejuni</i>         | 80.gbk  | 73  | 21 | 20 |
| <i>C. jejuni</i>         | 81.gbk  | 106 | 14 | 14 |
| <i>C. jejuni</i>         | 82.gbk  | 163 | 16 | 15 |
| <i>C. jejuni</i>         | 83.gbk  | 617 | 19 | 18 |
| <i>C. jejuni</i>         | 84.gbk  | 58  | 16 | 15 |
| <i>C. jejuni</i>         | 85.gbk  | 93  | 22 | 18 |
| <i>C. jejuni</i>         | 86.gbk  | 197 | 20 | 20 |
| <i>C. jejuni</i>         | 87.gbk  | 62  | 30 | 26 |
| <i>C. jejuni</i>         | 88.gbk  | 72  | 29 | 23 |
| <i>C. jejuni</i>         | 89.gbk  | 130 | 24 | 19 |
| <i>C. jejuni</i>         | 90.gbk  | 64  | 15 | 15 |
| <i>C. jejuni</i>         | 91.gbk  | 47  | 17 | 17 |
| <i>C. jejuni</i>         | 92.gbk  | 98  | 20 | 19 |
| <i>C. jejuni</i>         | 94.gbk  | 82  | 31 | 28 |
| <i>C. jejuni</i>         | 96.gbk  | 922 | 36 | 27 |
| <i>C. jejuni</i>         | 97.gbk  | 114 | 22 | 18 |
| <i>C. coli - clade 1</i> | 98.gbk  | 119 | 23 | 17 |
| <i>C. jejuni</i>         | 99.gbk  | 64  | 30 | 24 |
| <i>C. jejuni</i>         | 100.gbk | 192 | 13 | 12 |
| <i>C. jejuni</i>         | 102.gbk | 63  | 16 | 16 |
| <i>C. jejuni</i>         | 103.gbk | 70  | 17 | 17 |
| <i>C. jejuni</i>         | 104.gbk | 115 | 15 | 14 |
| <i>C. jejuni</i>         | 105.gbk | 75  | 28 | 28 |
| <i>C. jejuni</i>         | 106.gbk | 58  | 27 | 25 |
| <i>C. jejuni</i>         | 107.gbk | 273 | 35 | 31 |
| <i>C. jejuni</i>         | 108.gbk | 80  | 32 | 27 |
| <i>C. jejuni</i>         | 109.gbk | 152 | 20 | 16 |
| <i>C. jejuni</i>         | 110.gbk | 72  | 26 | 21 |

|                          |         |      |    |    |
|--------------------------|---------|------|----|----|
| <i>C. jejuni</i>         | 111.gbk | 80   | 16 | 15 |
| <i>C. jejuni</i>         | 112.gbk | 55   | 17 | 16 |
| <i>C. jejuni</i>         | 113.gbk | 72   | 25 | 23 |
| <i>C. jejuni</i>         | 114.gbk | 79   | 14 | 14 |
| <i>C. jejuni</i>         | 116.gbk | 65   | 28 | 22 |
| <i>C. jejuni</i>         | 117.gbk | 113  | 25 | 20 |
| <i>C. jejuni</i>         | 119.gbk | 66   | 16 | 16 |
| <i>C. jejuni</i>         | 122.gbk | 52   | 10 | 10 |
| <i>C. jejuni</i>         | 124.gbk | 112  | 12 | 12 |
| <i>C. jejuni</i>         | 125.gbk | 61   | 14 | 12 |
| <i>C. jejuni</i>         | 126.gbk | 149  | 24 | 22 |
| <i>C. jejuni</i>         | 127.gbk | 2598 | 4  | 2  |
| <i>C. jejuni</i>         | 128.gbk | 53   | 11 | 11 |
| <i>C. jejuni</i>         | 129.gbk | 143  | 28 | 24 |
| <i>C. jejuni</i>         | 130.gbk | 108  | 31 | 25 |
| <i>C. jejuni</i>         | 131.gbk | 60   | 19 | 16 |
| <i>C. coli - clade 1</i> | 132.gbk | 122  | 18 | 15 |
| <i>C. coli</i>           | 133.gbk | 92   | 14 | 12 |
| <i>C. coli - clade 1</i> | 134.gbk | 77   | 10 | 9  |
| <i>C. coli</i>           | 135.gbk | 198  | 17 | 14 |
| <i>C. coli - clade 1</i> | 136.gbk | 150  | 16 | 13 |
| <i>C. coli - clade 1</i> | 137.gbk | 148  | 12 | 12 |
| <i>C. coli - clade 1</i> | 138.gbk | 104  | 17 | 14 |
| <i>C. coli - clade 1</i> | 139.gbk | 243  | 17 | 13 |
| <i>C. coli - clade 1</i> | 140.gbk | 217  | 18 | 15 |
| <i>C. coli - clade 1</i> | 141.gbk | 199  | 15 | 13 |
| <i>C. coli - clade 1</i> | 142.gbk | 118  | 19 | 16 |
| <i>C. coli - clade 1</i> | 143.gbk | 238  | 15 | 12 |
| <i>C. coli - clade 1</i> | 144.gbk | 99   | 11 | 9  |
| <i>C. coli - clade 1</i> | 145.gbk | 125  | 17 | 15 |
| <i>C. coli - clade 1</i> | 146.gbk | 129  | 17 | 17 |
| <i>C. coli - clade 1</i> | 147.gbk | 112  | 17 | 14 |

|                          |         |     |    |    |
|--------------------------|---------|-----|----|----|
| <i>C. coli - clade 1</i> | 148.gbk | 116 | 22 | 18 |
| <i>C. coli - clade 1</i> | 149.gbk | 116 | 22 | 18 |
| <i>C. coli - clade 1</i> | 150.gbk | 111 | 19 | 17 |
| <i>C. coli - clade 1</i> | 151.gbk | 110 | 20 | 18 |
| <i>C. coli - clade 1</i> | 152.gbk | 115 | 15 | 13 |
| <i>C. coli - clade 1</i> | 153.gbk | 181 | 13 | 12 |
| <i>C. coli - clade 1</i> | 154.gbk | 146 | 19 | 16 |
| <i>C. coli - clade 1</i> | 155.gbk | 166 | 16 | 14 |
| <i>C. coli - clade 1</i> | 156.gbk | 76  | 10 | 10 |
| <i>C. coli - clade 1</i> | 157.gbk | 161 | 15 | 13 |
| <i>C. coli - clade 1</i> | 158.gbk | 103 | 17 | 16 |
| <i>C. coli - clade 1</i> | 159.gbk | 105 | 16 | 14 |
| <i>C. coli - clade 1</i> | 160.gbk | 157 | 17 | 15 |
| <i>C. coli - clade 1</i> | 161.gbk | 85  | 15 | 13 |
| <i>C. coli - clade 1</i> | 162.gbk | 83  | 17 | 14 |
| <i>C. coli - clade 1</i> | 163.gbk | 169 | 13 | 13 |
| <i>C. coli</i>           | 164.gbk | 88  | 13 | 11 |
| <i>C. coli - clade 1</i> | 165.gbk | 80  | 18 | 16 |
| <i>C. coli</i>           | 166.gbk | 159 | 21 | 16 |
| <i>C. coli - clade 1</i> | 167.gbk | 127 | 11 | 10 |
| <i>C. coli - clade 1</i> | 168.gbk | 139 | 14 | 13 |
| <i>C. coli - clade 1</i> | 169.gbk | 71  | 14 | 12 |
| <i>C. coli - clade 1</i> | 170.gbk | 110 | 17 | 13 |
| <i>C. coli - clade 1</i> | 171.gbk | 82  | 13 | 11 |
| <i>C. jejuni</i>         | 172.gbk | 98  | 14 | 13 |
| <i>C. jejuni</i>         | 173.gbk | 195 | 24 | 21 |
| <i>C. jejuni</i>         | 174.gbk | 162 | 14 | 13 |
| <i>C. jejuni</i>         | 175.gbk | 84  | 15 | 13 |
| <i>C. jejuni</i>         | 176.gbk | 101 | 21 | 20 |
| <i>C. jejuni</i>         | 177.gbk | 127 | 16 | 15 |
| <i>C. jejuni</i>         | 178.gbk | 108 | 19 | 19 |
| <i>C. jejuni</i>         | 179.gbk | 116 | 23 | 19 |

|                  |         |     |    |    |
|------------------|---------|-----|----|----|
| <i>C. jejuni</i> | 180.gbk | 151 | 27 | 24 |
| <i>C. jejuni</i> | 181.gbk | 89  | 13 | 13 |
| <i>C. jejuni</i> | 182.gbk | 109 | 17 | 17 |
| <i>C. jejuni</i> | 183.gbk | 114 | 18 | 17 |
| <i>C. jejuni</i> | 184.gbk | 116 | 12 | 12 |
| <i>C. jejuni</i> | 185.gbk | 221 | 23 | 21 |
| <i>C. jejuni</i> | 186.gbk | 88  | 19 | 17 |
| <i>C. jejuni</i> | 187.gbk | 145 | 21 | 19 |
| <i>C. jejuni</i> | 188.gbk | 88  | 20 | 20 |
| <i>C. jejuni</i> | 189.gbk | 129 | 15 | 14 |
| <i>C. jejuni</i> | 190.gbk | 92  | 20 | 18 |
| <i>C. jejuni</i> | 191.gbk | 102 | 13 | 13 |
| <i>C. jejuni</i> | 192.gbk | 170 | 26 | 23 |
| <i>C. jejuni</i> | 193.gbk | 86  | 22 | 21 |
| <i>C. jejuni</i> | 194.gbk | 214 | 23 | 21 |
| <i>C. jejuni</i> | 195.gbk | 107 | 21 | 17 |
| <i>C. jejuni</i> | 196.gbk | 117 | 21 | 19 |
| <i>C. jejuni</i> | 197.gbk | 84  | 19 | 17 |
| <i>C. jejuni</i> | 198.gbk | 214 | 24 | 24 |
| <i>C. jejuni</i> | 199.gbk | 90  | 17 | 16 |
| <i>C. jejuni</i> | 200.gbk | 183 | 25 | 22 |
| <i>C. jejuni</i> | 201.gbk | 189 | 27 | 26 |
| <i>C. jejuni</i> | 202.gbk | 102 | 16 | 13 |
| <i>C. jejuni</i> | 203.gbk | 94  | 15 | 12 |
| <i>C. jejuni</i> | 204.gbk | 179 | 25 | 23 |
| <i>C. jejuni</i> | 205.gbk | 93  | 20 | 18 |
| <i>C. jejuni</i> | 206.gbk | 111 | 19 | 19 |
| <i>C. jejuni</i> | 207.gbk | 138 | 24 | 22 |
| <i>C. jejuni</i> | 208.gbk | 94  | 17 | 15 |
| <i>C. jejuni</i> | 209.gbk | 80  | 18 | 16 |
| <i>C. jejuni</i> | 210.gbk | 89  | 26 | 24 |
| <i>C. jejuni</i> | 211.gbk | 174 | 18 | 17 |



|                  |         |     |    |    |
|------------------|---------|-----|----|----|
| <i>C. jejuni</i> | 212.gbk | 76  | 17 | 15 |
| <i>C. jejuni</i> | 213.gbk | 117 | 24 | 22 |
| <i>C. jejuni</i> | 214.gbk | 85  | 21 | 19 |

---

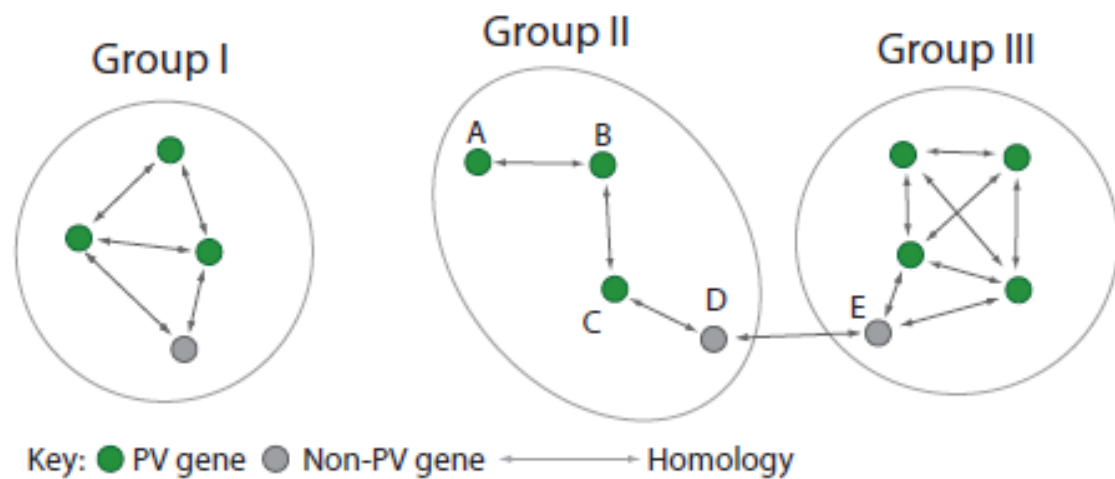

**Supplementary Figure 1. Grouping genes into homology groups.** Coloured circles show identified genes, and arrows show homology relationships between genes. Genes that are connected by homology relationships are placed in the same group. Thus, A and C are in the same homology group even though they share no homology relationship because they are both homologous to B. D and E do not connect groups II and III because D and E are non-PV homologues and the program does not search for homology relationships from these genes. Instead they are grouped only with PV genes homologous to them.

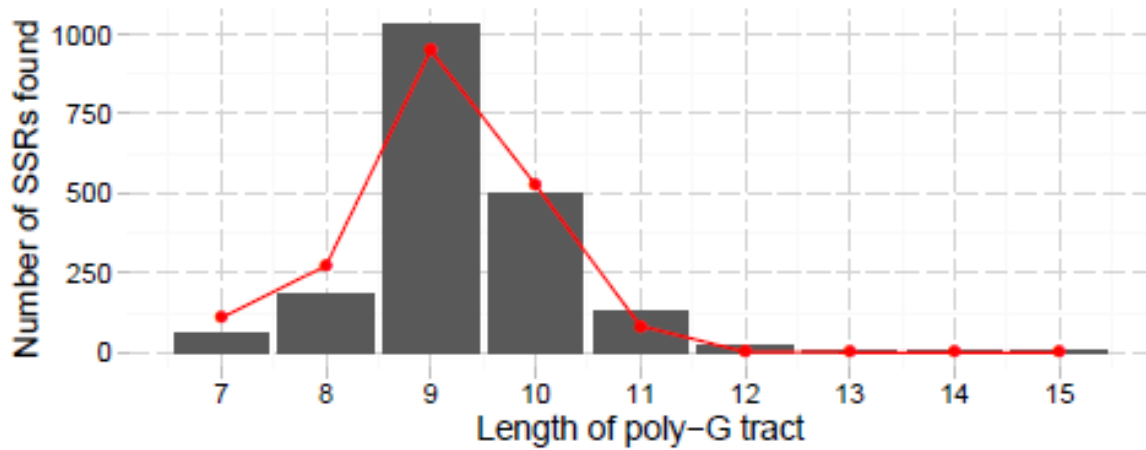

**Supplementary Figure 2. Distribution of poly-G tract lengths in *Campylobacter* genome sequences.** This graph shows counts of poly-G tracts of each length found in the analysed *Campylobacter* genome sequences from a total of 1,944 tracts. Red line shows predicted distribution without selection based on empirical data of mutation rate for each tract length. Poly-G tracts of length below 7 were excluded from the search. Tracts that are poly-C in the direction of coding are also included.

Shorter tract (*clpX* group):

```
      I I E G S L V N I P P R G G R K H P N Q E F
NCTC 11168 ATTATCGAAGGAAGTTTGGTAAATATTCCACCAAGGGGGGGAGAAAACATCCAAATCAAGAGTTT
      |||
81-176     ATTATCGAAGGAAGTTTGGTAAATATTCCACCAAAAAGGGGAAGAAAACATCCAAATCAAGAGTTT
      I I E G S L V N I P P K G G R K H P N Q E F
```

Disrupted tract (*CJ181176\_0758* group):

```
      L I T A A F T D R G G G F N N Q T I L K E N
4031     TTAATTACTGCGGCGTTTACTGACAGGGGGGGGGATTTAACAATCAAACCATTTTAAAAGAAAAC
      |||
NCTC 11168 TTAATTACTGCGGCGTTTACTGACAGGGGGGAGGGATTTAACAATCAAACCATTTTAAAAGAAAAC
      L I T A A F T D R G E G F N N Q T I L K E N
```

Dissimilar sequence (*kfoC* group):

```
      G L L R A R Y E G V K A A G G G Y I M F L D
NCTC 11351 GGTCTTTTAAGAGCTAGATATGAAGGAGTTAAGGCAGCTGGGGGGGGATATATTATGTTTTTAGAC
      |||
81-176     GGTCTTTTAAGAGCAAGATATGAAGGTGTGAAAGTAGCAAACCTCTCCTTATATAATGTTTTTAGAT
      G L L R A R Y E G V K V A N S P Y I M F L D
```

**Supplementary Figure 3. Comparison of region around PV tract against non-PV homologues.** This figure shows examples of three possible cases of how PV and non-PV homologues differ. In each case, the PV homologue is shown on the top with the translated sequence above, and the non-PV homologue is shown below with the translated sequence below. Amino acid sequence differences are highlighted in red. All three are drawn from strains of *C. jejuni*.
